# Supplementary material
Source: publisher figshare collection journal article supplement (https://aacr.figshare.com/articles/dataset/_/22478763)

**Safety and Immunogenicity of LY3415244, a Bispecific Antibody Against TIM-3 and PD-L1, in Patients With Advanced Solid Tumors**

**Supplemental Figure 2. Consort Diagram**

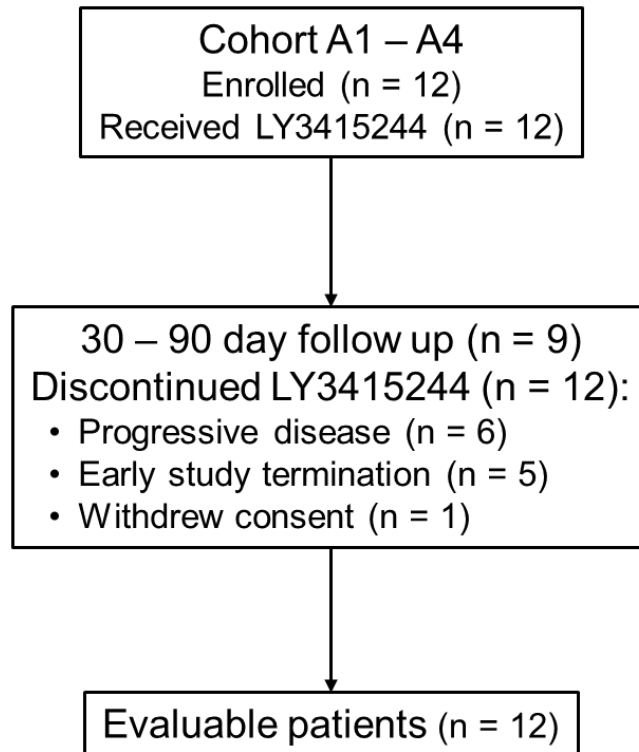

Supplement: Supplementary file 1 [file 39930261]
